# Supplementary material for: Lisosan G Protects the Retina from Neurovascular Damage in Experimental Diabetic Retinopathy
Source: MDPI journal article supplement (doi:10.3390/nu10121932), 2018-12-05
Supplement: s1 [file s1]

## Supplementary Materials

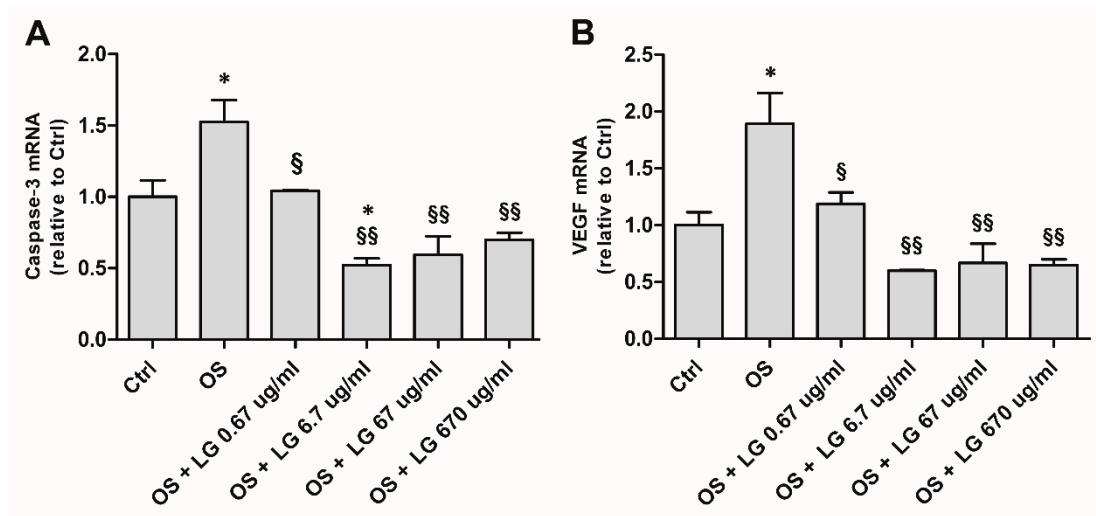

**Figure S1.** Dose-response of Lisosan G (LG) effects on the expression of Caspase 3 mRNA (A) and of VEGF mRNA (B) in mouse retinal explants exposed to oxidative stress (OS). A dose-dependent effect of LG was observed with doses of 0.67 and 6.7 µg/ml. LG at higher doses did not induce any further changes in either caspase-3 or VEGF mRNA expression. Therefore, the experiments were conducted using 0.67 or 6.7 µg/ml LG. Each column represents mean ± SD. \* $p < 0.05$  vs Ctrl; \$ $p < 0.05$  vs OS; \$\$ $p < 0.01$  vs OS;  $n = 3$ .
